# Supplementary material for: Petrogenesis and Tectonic Setting of the Baluogenguole Mafic Dykes, Zongwulong Belt: Implications for Evolution of the Northern East Paleo-Tethys Ocean
Source: MDPI journal article supplement (doi:10.3390/min14050473), 2024-04-29
Supplement: s1 [file s1]

Supplementary Materials

Table S1: Whole-rock major (%) and trace elements (ppm) compositions of Baluogenguole mafic dykes in the ZTB

| Samples                        | 1-1   | 2-1   | 3-2   | 4-1   | 4-2   | 5-1   | 5-2   | 6-2   | 7-1   | 7-2   | 8-1   | 8-2   |
|--------------------------------|-------|-------|-------|-------|-------|-------|-------|-------|-------|-------|-------|-------|
| SiO <sub>2</sub>               | 49.9  | 50.7  | 50.9  | 47.3  | 49.4  | 50.5  | 50.2  | 51.0  | 49.4  | 48.7  | 51.8  | 51.3  |
| TiO <sub>2</sub>               | 2.36  | 2.48  | 3.46  | 3.35  | 3.26  | 2.55  | 2.02  | 4.05  | 3.10  | 2.69  | 2.69  | 2.84  |
| Al <sub>2</sub> O <sub>3</sub> | 15.4  | 16.1  | 14.7  | 16.3  | 15.5  | 16.0  | 17.0  | 13.5  | 15.7  | 16.9  | 15.7  | 15.8  |
| T <sub>Fe2O3</sub>             | 13.1  | 12.9  | 15.6  | 13.9  | 15.2  | 13.4  | 12.7  | 15.9  | 13.9  | 14.0  | 13.7  | 13.6  |
| MnO                            | 0.18  | 0.19  | 0.17  | 0.19  | 0.19  | 0.19  | 0.19  | 0.20  | 0.18  | 0.17  | 0.19  | 0.18  |
| MgO                            | 6.51  | 6.48  | 5.23  | 4.46  | 6.29  | 6.65  | 6.34  | 4.11  | 5.96  | 6.37  | 7.50  | 6.47  |
| CaO                            | 7.98  | 7.40  | 5.63  | 8.97  | 7.05  | 7.65  | 7.55  | 7.23  | 7.45  | 7.04  | 4.46  | 6.83  |
| Na <sub>2</sub> O              | 3.52  | 2.81  | 3.75  | 3.92  | 2.63  | 2.26  | 3.16  | 3.40  | 3.80  | 3.73  | 3.42  | 2.54  |
| K <sub>2</sub> O               | 0.87  | 0.61  | 0.14  | 1.10  | 0.21  | 0.40  | 0.58  | 0.08  | 0.19  | 0.24  | 0.30  | 0.21  |
| P <sub>2</sub> O <sub>5</sub>  | 0.24  | 0.26  | 0.45  | 0.51  | 0.31  | 0.32  | 0.25  | 0.47  | 0.33  | 0.30  | 0.28  | 0.28  |
| Y                              | 19.83 | 21.35 | 30.61 | 28.86 | 25.89 | 26.28 | 23.16 | 37.06 | 28.29 | 23.85 | 22.99 | 27.97 |
| La                             | 9.84  | 10.78 | 19.39 | 36.68 | 19.37 | 19.53 | 14.14 | 29.04 | 21.34 | 17.52 | 11.54 | 20.15 |
| Ce                             | 22.36 | 24.29 | 42.56 | 72.00 | 40.77 | 41.02 | 30.53 | 63.58 | 43.79 | 36.88 | 28.11 | 43.58 |
| Pr                             | 3.04  | 3.25  | 5.45  | 8.55  | 5.04  | 5.08  | 3.84  | 8.16  | 5.40  | 4.59  | 3.62  | 5.43  |
| Nd                             | 13.63 | 14.31 | 23.55 | 32.69 | 20.84 | 20.92 | 16.18 | 34.34 | 22.23 | 18.88 | 16.31 | 22.70 |
| Sm                             | 3.71  | 3.97  | 6.10  | 6.82  | 5.10  | 5.12  | 4.18  | 8.34  | 5.50  | 4.67  | 4.49  | 5.65  |
| Eu                             | 1.34  | 1.19  | 2.33  | 2.05  | 1.65  | 1.65  | 1.43  | 2.67  | 1.77  | 1.57  | 1.53  | 1.84  |
| Gd                             | 3.87  | 4.20  | 6.32  | 6.64  | 5.26  | 5.32  | 4.48  | 8.35  | 5.63  | 4.81  | 4.63  | 5.78  |
| Tb                             | 0.64  | 0.68  | 1.01  | 0.95  | 0.83  | 0.84  | 0.73  | 1.27  | 0.90  | 0.76  | 0.76  | 0.91  |
| Dy                             | 3.70  | 3.98  | 5.74  | 5.27  | 4.82  | 4.89  | 4.31  | 7.05  | 5.12  | 4.39  | 4.39  | 5.22  |
| Ho                             | 0.74  | 0.79  | 1.13  | 1.05  | 0.96  | 0.97  | 0.86  | 1.38  | 1.03  | 0.88  | 0.87  | 1.04  |
| Er                             | 1.91  | 2.02  | 2.94  | 2.79  | 2.52  | 2.54  | 2.24  | 3.56  | 2.71  | 2.28  | 2.21  | 2.69  |
| Tm                             | 0.27  | 0.29  | 0.41  | 0.40  | 0.36  | 0.36  | 0.32  | 0.50  | 0.39  | 0.33  | 0.31  | 0.38  |
| Yb                             | 1.68  | 1.79  | 2.54  | 2.50  | 2.25  | 2.26  | 2.00  | 3.10  | 2.46  | 2.06  | 1.97  | 2.41  |
| Lu                             | 0.23  | 0.25  | 0.36  | 0.36  | 0.32  | 0.31  | 0.28  | 0.43  | 0.35  | 0.29  | 0.28  | 0.34  |
| V                              | 231.6 | 230.8 | 355.7 | 254.8 | 312.7 | 251.2 | 216.3 | 310.4 | 258.2 | 239.7 | 246.1 | 255.1 |
| Cr                             | 143.8 | 150.8 | 130.5 | 32.27 | 130.5 | 156.8 | 139.0 | 312.4 | 112.3 | 89.02 | 281.9 | 204.9 |
| Co                             | 44.10 | 35.30 | 44.91 | 35.86 | 40.27 | 40.82 | 39.09 | 46.95 | 38.90 | 34.41 | 44.22 | 40.44 |

|                                  |       |       |       |       |       |       |       |       |       |       |       |       |
|----------------------------------|-------|-------|-------|-------|-------|-------|-------|-------|-------|-------|-------|-------|
| Ni                               | 88.99 | 86.70 | 71.84 | 31.48 | 82.39 | 89.45 | 83.99 | 150.2 | 72.88 | 70.51 | 153.0 | 116.4 |
| Ga                               | 17.88 | 17.82 | 21.44 | 19.99 | 20.77 | 19.67 | 18.56 | 22.65 | 20.87 | 18.99 | 17.82 | 19.99 |
| Rb                               | 34.73 | 21.22 | 5.15  | 26.54 | 8.04  | 17.40 | 16.40 | 2.01  | 6.98  | 9.00  | 11.57 | 3.56  |
| Sr                               | 178.6 | 223.3 | 344.7 | 304.5 | 340.7 | 728.0 | 395.0 | 419.9 | 406.6 | 423.2 | 184.8 | 430.0 |
| Zr                               | 100.4 | 104.6 | 158.0 | 216.3 | 143.8 | 147.8 | 115.1 | 244.1 | 157.0 | 131.8 | 127.5 | 164.3 |
| Nb                               | 13.49 | 14.36 | 24.59 | 50.65 | 26.30 | 27.81 | 19.82 | 31.92 | 28.98 | 23.41 | 17.26 | 26.65 |
| Mo                               | 0.55  | 0.48  | 0.93  | 1.13  | 0.90  | 0.63  | 0.87  | 2.47  | 0.67  | 0.45  | 1.63  | 1.36  |
| In                               | 0.07  | 0.07  | 0.09  | 0.08  | 0.08  | 0.08  | 0.07  | 0.10  | 0.08  | 0.07  | 0.07  | 0.08  |
| Cs                               | 2.00  | 1.56  | 0.82  | 1.79  | 0.73  | 1.54  | 1.22  | 0.33  | 0.73  | 0.87  | 1.09  | 0.61  |
| Ba                               | 115.7 | 78.2  | 227.7 | 229.4 | 265.9 | 215.4 | 174.4 | 73.62 | 126.7 | 186.0 | 60.4  | 129.3 |
| Hf                               | 2.41  | 2.55  | 3.81  | 4.79  | 3.48  | 3.54  | 2.88  | 5.73  | 3.75  | 3.17  | 3.12  | 3.96  |
| Ta                               | 0.76  | 0.79  | 1.35  | 2.72  | 1.45  | 1.51  | 1.08  | 1.84  | 1.63  | 1.33  | 1.00  | 1.52  |
| W                                | 0.19  | 0.88  | 0.35  | 0.60  | 0.35  | 0.38  | 0.43  | 0.68  | 0.37  | 0.29  | 0.45  | 0.41  |
| Tl                               | 0.15  | 0.09  | 0.03  | 0.12  | 0.04  | 0.08  | 0.07  | 0.01  | 0.03  | 0.04  | 0.05  | 0.02  |
| Pb                               | 6.65  | 4.77  | 12.16 | 3.01  | 6.51  | 4.01  | 3.11  | 9.08  | 7.94  | 7.97  | 11.99 | 8.96  |
| Th                               | 1.10  | 1.21  | 2.48  | 5.12  | 2.52  | 2.39  | 1.75  | 4.37  | 2.74  | 2.25  | 1.40  | 2.71  |
| U                                | 0.60  | 1.06  | 0.62  | 1.25  | 0.59  | 0.57  | 0.41  | 0.99  | 0.63  | 0.55  | 0.69  | 0.60  |
| ΣREE                             | 66.95 | 71.80 | 119.8 | 178.8 | 110.1 | 110.8 | 85.53 | 171.8 | 118.6 | 99.91 | 81.03 | 88.98 |
| LREE                             | 53.92 | 57.81 | 99.38 | 158.8 | 92.78 | 93.33 | 70.31 | 146.1 | 100.0 | 84.11 | 65.61 | 72.72 |
| HREE                             | 13.03 | 13.99 | 20.44 | 19.97 | 17.32 | 17.51 | 15.22 | 25.63 | 18.58 | 15.80 | 15.42 | 16.26 |
| LREE/HREE                        | 4.14  | 4.13  | 4.86  | 7.95  | 5.36  | 5.33  | 4.62  | 5.70  | 5.39  | 5.33  | 4.26  | 4.47  |
| La <sub>N</sub> /Yb <sub>N</sub> | 4.21  | 4.32  | 5.48  | 10.51 | 6.17  | 6.20  | 5.08  | 6.72  | 6.22  | 6.10  | 4.21  | 4.76  |
| δEu                              | 1.08  | 0.89  | 1.15  | 0.93  | 0.98  | 0.97  | 1.01  | 0.98  | 0.97  | 1.02  | 1.02  | 1.03  |
| δCe                              | 1.00  | 1.01  | 1.02  | 1.00  | 1.01  | 1.01  | 1.02  | 1.01  | 1.00  | 1.01  | 1.07  | 1.01  |

Note: TFeO (wt.%) = FeO(wt.%) + 0.8998\*Fe<sub>2</sub>O<sub>3</sub>(wt.%); Mg#=100\*MgO(wt.+)/40/(MgO(wt.+)/40+TFeO(wt.+)/72);

A/CNK=Al<sub>2</sub>O<sub>3</sub>/(CaO+Na<sub>2</sub>O+K<sub>2</sub>O);A/NK=Al<sub>2</sub>O<sub>3</sub>/(Na<sub>2</sub>O+K<sub>2</sub>O).

Table S2: LA-ICM-MS zircon U–Pb data of Baluogenguole mafic dykes in the ZTB

| No | ppm |     | Th/U | Isotope ratios                   |            |                                  |            |                                   |            | Isotopic ages (Ma)               |            |                                  |            |                                   |            | Concordance |
|----|-----|-----|------|----------------------------------|------------|----------------------------------|------------|-----------------------------------|------------|----------------------------------|------------|----------------------------------|------------|-----------------------------------|------------|-------------|
|    | Th  | U   |      | $^{207}\text{Pb}/^{235}\text{U}$ | 2 $\sigma$ | $^{206}\text{Pb}/^{238}\text{U}$ | 2 $\sigma$ | $^{207}\text{Pb}/^{206}\text{Pb}$ | 2 $\sigma$ | $^{207}\text{Pb}/^{235}\text{U}$ | 2 $\sigma$ | $^{206}\text{Pb}/^{238}\text{U}$ | 2 $\sigma$ | $^{207}\text{Pb}/^{206}\text{Pb}$ | 2 $\sigma$ |             |
| 1  | 76  | 123 | 0.6  | 0.3310                           | 0.0220     | 0.0463                           | 0.0008     | 0.0508                            | 0.0031     | 288                              | 16.0       | 292                              | 4.7        | 220                               | 130.0      | 99          |
| 2  | 369 | 322 | 1.2  | 0.3330                           | 0.0170     | 0.0454                           | 0.0009     | 0.0539                            | 0.0026     | 291                              | 13.0       | 287                              | 5.7        | 330                               | 110.0      | 98          |
| 3  | 327 | 298 | 1.1  | 0.3300                           | 0.0140     | 0.0460                           | 0.0008     | 0.0527                            | 0.0023     | 288                              | 11.0       | 290                              | 4.7        | 277                               | 93.0       | 99          |
| 4  | 101 | 134 | 0.8  | 0.3350                           | 0.0160     | 0.0460                           | 0.0006     | 0.0529                            | 0.0024     | 291                              | 12.0       | 290                              | 3.9        | 260                               | 99.0       | 100         |
| 8  | 148 | 193 | 0.8  | 0.3220                           | 0.0210     | 0.0456                           | 0.0009     | 0.0511                            | 0.0035     | 282                              | 17.0       | 287                              | 5.7        | 200                               | 140.0      | 95          |
| 9  | 158 | 186 | 0.9  | 0.3420                           | 0.0200     | 0.0459                           | 0.0007     | 0.0540                            | 0.0031     | 297                              | 15.0       | 289                              | 4.4        | 310                               | 120.0      | 87          |
| 10 | 524 | 435 | 1.2  | 0.3090                           | 0.0170     | 0.0438                           | 0.0008     | 0.0520                            | 0.0028     | 272                              | 13.0       | 277                              | 4.9        | 260                               | 120.0      | 89          |
| 11 | 196 | 259 | 0.8  | 0.3430                           | 0.0200     | 0.0454                           | 0.0007     | 0.0547                            | 0.0033     | 298                              | 15.0       | 286                              | 4.6        | 340                               | 130.0      | 98          |
| 12 | 268 | 265 | 1.0  | 0.3280                           | 0.0250     | 0.0463                           | 0.0010     | 0.0513                            | 0.0037     | 287                              | 19.0       | 292                              | 6.2        | 210                               | 160.0      | 97          |
| 13 | 69  | 111 | 0.6  | 0.3190                           | 0.0190     | 0.0457                           | 0.0008     | 0.0507                            | 0.0030     | 279                              | 14.0       | 288                              | 5.0        | 190                               | 130.0      | 98          |
| 15 | 139 | 170 | 0.8  | 0.3320                           | 0.0150     | 0.0460                           | 0.0006     | 0.0525                            | 0.0023     | 289                              | 11.0       | 290                              | 3.7        | 252                               | 94.0       | 96          |
| 16 | 155 | 320 | 0.5  | 0.5380                           | 0.0140     | 0.0697                           | 0.0008     | 0.0562                            | 0.0014     | 436                              | 9.2        | 434                              | 4.8        | 437                               | 56.0       | 98          |
| 17 | 123 | 163 | 0.8  | 0.3370                           | 0.0220     | 0.0465                           | 0.0009     | 0.0526                            | 0.0034     | 293                              | 17.0       | 293                              | 5.7        | 270                               | 140.0      | 97          |
| 18 | 78  | 110 | 0.7  | 0.3270                           | 0.0200     | 0.0459                           | 0.0008     | 0.0517                            | 0.0032     | 285                              | 15.0       | 289                              | 4.7        | 210                               | 130.0      | 95          |
| 21 | 136 | 203 | 0.7  | 0.3370                           | 0.0140     | 0.0460                           | 0.0006     | 0.0536                            | 0.0023     | 294                              | 11.0       | 290                              | 3.6        | 297                               | 90.0       | 100         |
| 22 | 116 | 273 | 0.4  | 0.5370                           | 0.0150     | 0.0708                           | 0.0008     | 0.0554                            | 0.0016     | 435                              | 10.0       | 441                              | 4.9        | 398                               | 62.0       | 100         |
| 23 | 111 | 174 | 0.6  | 0.3300                           | 0.0150     | 0.0459                           | 0.0006     | 0.0523                            | 0.0023     | 288                              | 12.0       | 289                              | 3.9        | 250                               | 95.0       | 100         |
| 24 | 118 | 188 | 0.6  | 0.3400                           | 0.0220     | 0.0453                           | 0.0009     | 0.0546                            | 0.0035     | 295                              | 17.0       | 285                              | 5.6        | 370                               | 140.0      | 99          |
| 25 | 99  | 187 | 0.5  | 0.5420                           | 0.0170     | 0.0710                           | 0.0009     | 0.0559                            | 0.0017     | 438                              | 12.0       | 442                              | 5.2        | 420                               | 67.0       | 93          |

| Table S3: Whole-rock Sr-Nd isotopic compositions of the Baluogenguole mafic dykes in the ZTB |         |                                    |                                    |          |                                                    |                                      |                                      |          |                                                      |        |          |
|----------------------------------------------------------------------------------------------|---------|------------------------------------|------------------------------------|----------|----------------------------------------------------|--------------------------------------|--------------------------------------|----------|------------------------------------------------------|--------|----------|
| No                                                                                           | Age(Ma) | <sup>85</sup> Rb/ <sup>86</sup> Sr | <sup>87</sup> Sr/ <sup>86</sup> Sr | 1SE      | ( <sup>87</sup> Sr/ <sup>86</sup> Sr) <sub>i</sub> | <sup>147</sup> Sm/ <sup>144</sup> Nd | <sup>143</sup> Nd/ <sup>144</sup> Nd | 1SE      | ( <sup>143</sup> Nd/ <sup>144</sup> Nd) <sub>i</sub> | εNd(t) | TDM (Ma) |
| 4-1                                                                                          | 289.3   | 0.0002                             | 0.717526                           | 0.000004 | 0.71753                                            | 0.0024                               | 0.512530                             | 0.000004 | 0.512525                                             | 5.07   | 449      |
| 7-1                                                                                          |         | 0.0005                             | 0.715876                           | 0.000007 | 0.71587                                            | 0.0005                               | 0.512645                             | 0.000006 | 0.512644                                             | 7.39   | 362      |
| 8-1                                                                                          |         | 0.0237                             | 0.722608                           | 0.000006 | 0.72251                                            | 0.0065                               | 0.512699                             | 0.000006 | 0.512687                                             | 8.23   | 333      |

| Table S4: LA-ICM-MS zircon Lu-Hf isotopic data of Baluogenguole mafic dykes in the ZTB |             |                                         |                                         |          |                                         |          |        |                    |     |  |
|----------------------------------------------------------------------------------------|-------------|-----------------------------------------|-----------------------------------------|----------|-----------------------------------------|----------|--------|--------------------|-----|--|
| spot                                                                                   | Age<br>(Ma) | <sup>176</sup> Yb/<br><sup>177</sup> Hf | <sup>176</sup> Lu/<br><sup>177</sup> Hf | 2σ       | <sup>176</sup> Hf/<br><sup>177</sup> Hf | 2σ       | εHf(t) | f <sub>Lu/Hf</sub> | TDM |  |
| B-04_01                                                                                | 292         | 0.032016                                | 0.000855                                | 0.000017 | 0.282681                                | 0.000018 | 3.03   | -0.97              | 806 |  |
| B-04_05                                                                                | 290         | 0.043861                                | 0.001146                                | 0.000028 | 0.282679                                | 0.000017 | 2.87   | -0.97              | 815 |  |
| B-04_07                                                                                | 285         | 0.021141                                | 0.000556                                | 0.000006 | 0.282654                                | 0.000018 | 1.99   | -0.98              | 837 |  |
| B-04_12                                                                                | 292         | 0.100491                                | 0.002578                                | 0.000007 | 0.282688                                | 0.000022 | 2.95   | -0.92              | 834 |  |
| B-04_14                                                                                | 290         | 0.037269                                | 0.000950                                | 0.000029 | 0.282698                                | 0.000020 | 3.58   | -0.97              | 783 |  |
| B-04_18                                                                                | 289         | 0.027367                                | 0.000761                                | 0.000010 | 0.282658                                | 0.000021 | 2.18   | -0.98              | 836 |  |
| B-04_21                                                                                | 289         | 0.055073                                | 0.001402                                | 0.000026 | 0.282658                                | 0.000019 | 2.04   | -0.96              | 851 |  |
| B-04_24                                                                                | 290         | 0.052202                                | 0.001323                                | 0.000017 | 0.282659                                | 0.000018 | 2.13   | -0.96              | 846 |  |
